# Supplementary material for: Identification of stage-related and severity-related biomarkers and exploration of immune landscape for Dengue by comprehensive analyses
Source: Springer Nature journal article supplement (doi:10.1186/s12985-022-01853-8), 2022-08-02

A

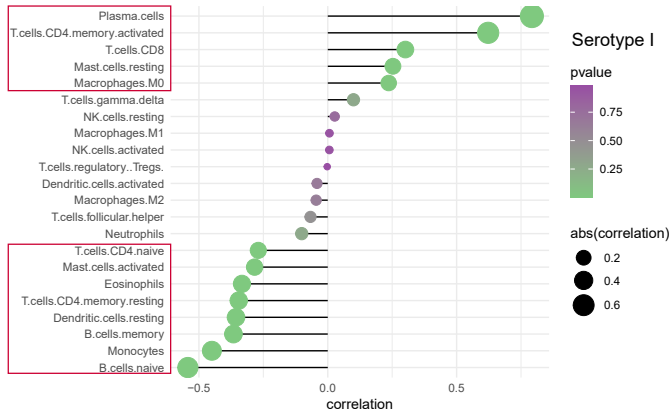

B

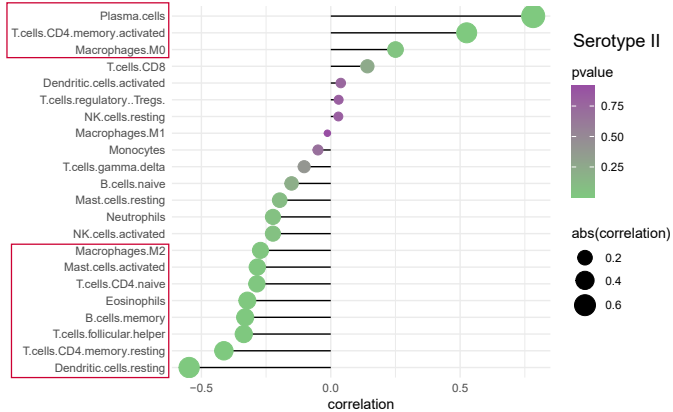

C

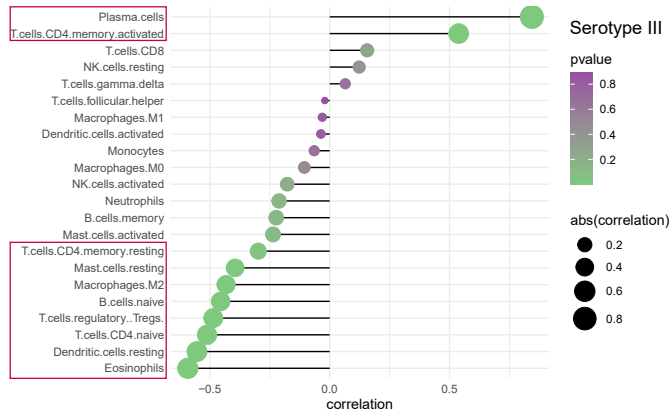

D

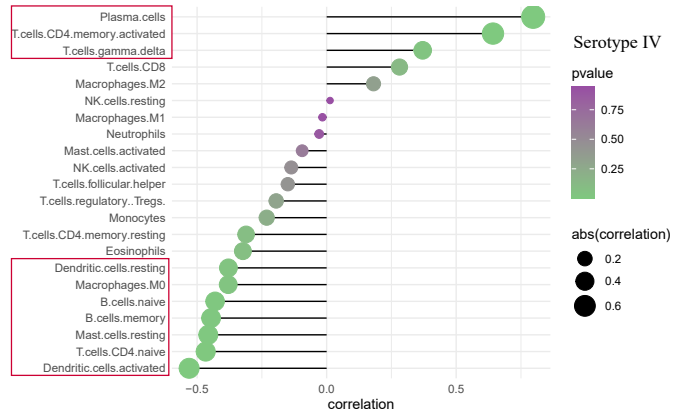

Supplement: MOESM5 [file 23329006]
