# Supplementary material for: Identification of stage-related and severity-related biomarkers and exploration of immune landscape for Dengue by comprehensive analyses
Source: Springer Nature journal article supplement (doi:10.1186/s12985-022-01853-8), 2022-08-02
Supplement: MOESM7 [file 23329006]

| Gene      | logFC    | AveExpr  | t        | P.Value  | adj.P.Val |
|-----------|----------|----------|----------|----------|-----------|
| IFI27     | 6.476419 | 8.517755 | 36.01416 | 1.15E-57 | 9.30E-54  |
| SERPING1  | 3.766264 | 7.435511 | 31.21745 | 3.71E-52 | 1.50E-48  |
| ISG15     | 3.355613 | 10.71839 | 25.21172 | 3.42E-44 | 9.21E-41  |
| MX1       | 2.858691 | 10.62336 | 24.13974 | 1.27E-42 | 2.57E-39  |
| IFITM3    | 1.993669 | 12.05478 | 23.70347 | 5.73E-42 | 9.27E-39  |
| IFITM1    | 1.455452 | 12.0561  | 23.24421 | 2.86E-41 | 3.85E-38  |
| USP18     | 2.562914 | 6.910707 | 22.98036 | 7.26E-41 | 8.39E-38  |
| IRF7      | 2.510148 | 9.172833 | 22.92098 | 8.97E-41 | 9.06E-38  |
| LGALS3BP  | 2.31518  | 7.826941 | 22.52306 | 3.72E-40 | 3.35E-37  |
| OAS2      | 2.127227 | 8.866427 | 22.48349 | 4.29E-40 | 3.47E-37  |
| MT2A      | 1.951413 | 10.89418 | 22.24169 | 1.03E-39 | 7.57E-37  |
| SIGLEC1   | 2.302852 | 7.867264 | 22.18394 | 1.27E-39 | 8.56E-37  |
| UBE2L6    | 1.559442 | 10.02154 | 21.69653 | 7.58E-39 | 4.71E-36  |
| MX2       | 2.011969 | 9.571431 | 20.83935 | 1.87E-37 | 1.08E-34  |
| IFI44L    | 3.284203 | 9.792911 | 20.81931 | 2.02E-37 | 1.09E-34  |
| HERC5     | 2.897219 | 8.481786 | 19.95158 | 5.67E-36 | 2.86E-33  |
| IFIH1     | 2.507172 | 6.663009 | 19.84564 | 8.57E-36 | 3.85E-33  |
| IFIT3     | 3.317893 | 9.570969 | 19.84532 | 8.58E-36 | 3.85E-33  |
| OAS1      | 2.478011 | 8.609798 | 19.79846 | 1.03E-35 | 4.34E-33  |
| OAS3      | 2.483065 | 9.430131 | 19.78798 | 1.07E-35 | 4.34E-33  |
| RPL15     | -1.16067 | 11.20305 | -19.5124 | 3.17E-35 | 1.22E-32  |
| OASL      | 2.412241 | 8.245835 | 19.4683  | 3.78E-35 | 1.39E-32  |
| PLSCR1    | 2.201189 | 10.15494 | 19.35737 | 5.86E-35 | 2.06E-32  |
| IFI44     | 2.405553 | 9.473641 | 19.19805 | 1.10E-34 | 3.72E-32  |
| IFITM2    | 1.505494 | 12.40325 | 19.17699 | 1.20E-34 | 3.88E-32  |
| IFIT1     | 3.999163 | 9.837913 | 19.1311  | 1.44E-34 | 4.48E-32  |
| CXCL10    | 4.0529   | 9.119427 | 18.88586 | 3.86E-34 | 1.15E-31  |
| GBP1      | 2.380375 | 9.186476 | 18.70799 | 7.90E-34 | 2.28E-31  |
| LY6E      | 2.02709  | 9.159572 | 18.66086 | 9.57E-34 | 2.67E-31  |
| MT1H      | 1.26982  | 9.661672 | 18.5714  | 1.38E-33 | 3.71E-31  |
| CD1C      | -1.23557 | 7.269684 | -18.2235 | 5.70E-33 | 1.44E-30  |
| ISG20     | 1.52729  | 9.705354 | 18.22321 | 5.71E-33 | 1.44E-30  |
| APOL6     | 1.189236 | 7.981179 | 17.58166 | 8.17E-32 | 2.00E-29  |
| AIM2      | 2.067903 | 7.722554 | 17.52081 | 1.05E-31 | 2.43E-29  |
| CCL2      | 3.346448 | 7.172573 | 17.24494 | 3.37E-31 | 7.57E-29  |
| LAP3      | 1.750951 | 9.793299 | 17.07124 | 7.04E-31 | 1.54E-28  |
| TNFSF10   | 2.350192 | 10.43542 | 16.87472 | 1.63E-30 | 3.46E-28  |
| RTP4      | 1.924457 | 7.737149 | 16.74624 | 2.82E-30 | 5.85E-28  |
| PSMB9     | 1.051836 | 10.27339 | 16.57812 | 5.82E-30 | 1.15E-27  |
| ADAR      | 1.079869 | 10.49261 | 16.39155 | 1.31E-29 | 2.46E-27  |
| LAMP3     | 2.075722 | 5.853532 | 16.34752 | 1.58E-29 | 2.90E-27  |
| CTSL      | 1.599636 | 7.970051 | 16.03245 | 6.25E-29 | 1.12E-26  |
| NMI       | 1.402723 | 9.572392 | 15.99273 | 7.45E-29 | 1.31E-26  |
| MT1X      | 1.319141 | 8.883495 | 15.96424 | 8.44E-29 | 1.45E-26  |
| RNASE2    | 1.87242  | 9.568733 | 15.67609 | 3.01E-28 | 4.96E-26  |
| SCO2      | 1.61904  | 9.235883 | 15.57602 | 4.69E-28 | 7.58E-26  |
| HESX1     | 2.008577 | 5.633309 | 15.52896 | 5.78E-28 | 9.16E-26  |
| GCH1      | 1.253618 | 10.14207 | 15.2474  | 2.03E-27 | 3.10E-25  |
| CCR1      | 1.414576 | 9.996939 | 14.90109 | 9.68E-27 | 1.42E-24  |
| TRIM21    | 1.050794 | 7.708094 | 14.72283 | 2.17E-26 | 3.14E-24  |
| HIST2H2BF | 1.75018  | 7.834621 | 14.637   | 3.21E-26 | 4.40E-24  |
| MTHFD2    | 1.20453  | 8.542944 | 14.59525 | 3.88E-26 | 5.23E-24  |
| TCN2      | 1.232039 | 6.59848  | 14.56144 | 4.53E-26 | 6.01E-24  |
| DDX58     | 2.109104 | 7.830652 | 14.46323 | 7.10E-26 | 9.12E-24  |
| MS4A4A    | 2.701242 | 6.834811 | 14.43032 | 8.26E-26 | 1.04E-23  |
| RPL10A    | -1.13017 | 11.51816 | -14.2881 | 1.59E-25 | 1.97E-23  |
| C1QB      | 1.669102 | 6.30562  | 14.26897 | 1.73E-25 | 2.12E-23  |

|           |          |          |          |          |          |
|-----------|----------|----------|----------|----------|----------|
| NELL2     | -1.74325 | 8.023461 | -14.1698 | 2.74E-25 | 3.18E-23 |
| VAMP5     | 1.410563 | 7.787231 | 14.07011 | 4.34E-25 | 4.87E-23 |
| TLR7      | 1.672053 | 6.564752 | 14.06648 | 4.41E-25 | 4.87E-23 |
| CACNA2D   | -1.39573 | 5.715858 | -14.0644 | 4.45E-25 | 4.87E-23 |
| HIST1H2BI | 1.586012 | 7.934041 | 14.01024 | 5.72E-25 | 6.09E-23 |
| IFIT5     | 1.68002  | 7.296031 | 13.86955 | 1.10E-24 | 1.14E-22 |
| GMPR      | 1.482376 | 5.967208 | 13.84333 | 1.24E-24 | 1.27E-22 |
| EIF3F     | -1.02561 | 10.42028 | -13.833  | 1.30E-24 | 1.32E-22 |
| IGF2BP3   | 1.092435 | 4.72826  | 13.79395 | 1.56E-24 | 1.52E-22 |
| SLC31A2   | 1.208286 | 8.999759 | 13.52853 | 5.40E-24 | 4.75E-22 |
| CCL8      | 3.426813 | 6.32016  | 13.50215 | 6.12E-24 | 5.32E-22 |
| WARS      | 1.472246 | 10.41746 | 13.37754 | 1.10E-23 | 9.35E-22 |
| H1FO      | 1.265898 | 6.921508 | 13.27722 | 1.76E-23 | 1.45E-21 |
| IFI16     | 1.194928 | 9.820166 | 13.19624 | 2.58E-23 | 2.01E-21 |
| DYNLT1    | 1.113984 | 10.1067  | 13.11992 | 3.70E-23 | 2.85E-21 |
| HIST1H1C  | 1.207348 | 6.925952 | 13.08625 | 4.34E-23 | 3.31E-21 |
| EEF2      | -1.18925 | 10.66412 | -13.0412 | 5.38E-23 | 3.99E-21 |
| TFEC      | 1.50313  | 7.847688 | 12.9964  | 6.65E-23 | 4.89E-21 |
| KLRB1     | -1.50119 | 9.117894 | -12.8745 | 1.19E-22 | 8.65E-21 |
| TRIM38    | 1.21715  | 8.038355 | 12.84329 | 1.38E-22 | 9.83E-21 |
| CASP5     | 1.049703 | 5.798581 | 12.73428 | 2.32E-22 | 1.61E-20 |
| IL15      | 1.076455 | 7.162237 | 12.70771 | 2.63E-22 | 1.80E-20 |
| MYOF      | 1.457588 | 7.973198 | 12.68617 | 2.91E-22 | 1.98E-20 |
| MICB      | 1.108826 | 7.739298 | 12.64725 | 3.51E-22 | 2.36E-20 |
| EIF4B     | -1.23242 | 8.811701 | -12.4442 | 9.28E-22 | 6.05E-20 |
| RPS5      | -1.04747 | 11.79002 | -12.4033 | 1.13E-21 | 7.30E-20 |
| STAT1     | 1.276812 | 8.66925  | 12.37792 | 1.28E-21 | 8.19E-20 |
| EIF2AK2   | 1.05241  | 7.465406 | 12.31492 | 1.73E-21 | 1.08E-19 |
| CD38      | 1.564701 | 7.946727 | 12.2691  | 2.15E-21 | 1.32E-19 |
| ABCA1     | 1.430788 | 6.271855 | 12.22049 | 2.72E-21 | 1.64E-19 |
| B4GALT5   | 1.052384 | 7.532669 | 12.09741 | 4.93E-21 | 2.87E-19 |
| DYSF      | 1.072579 | 7.820747 | 11.98135 | 8.65E-21 | 4.79E-19 |
| NAP1L1    | -1.14976 | 6.837147 | -11.9758 | 8.88E-21 | 4.88E-19 |
| HPSE      | 1.229736 | 7.071722 | 11.90344 | 1.26E-20 | 6.89E-19 |
| JUP       | 1.052401 | 6.253511 | 11.88691 | 1.37E-20 | 7.36E-19 |
| LILRB4    | 1.127184 | 6.555443 | 11.83344 | 1.77E-20 | 9.42E-19 |
| LILRB2    | 1.24623  | 8.91299  | 11.82692 | 1.83E-20 | 9.66E-19 |
| LMO2      | 1.078096 | 9.156565 | 11.77094 | 2.40E-20 | 1.25E-18 |
| LILRA3    | 1.53112  | 7.80214  | 11.74442 | 2.73E-20 | 1.41E-18 |
| RPLP0     | -1.11372 | 10.80337 | -11.7112 | 3.21E-20 | 1.64E-18 |
| RTN1      | -1.43975 | 5.004184 | -11.6382 | 4.58E-20 | 2.30E-18 |
| FPR2      | 1.448619 | 6.945157 | 11.35939 | 1.78E-19 | 8.34E-18 |
| C1QA      | 1.612135 | 6.597955 | 11.0999  | 6.36E-19 | 2.92E-17 |
| EXT1      | 1.036319 | 6.371398 | 11.03596 | 8.71E-19 | 3.98E-17 |
| KMO       | 1.046783 | 6.926891 | 10.93811 | 1.41E-18 | 6.32E-17 |
| 4-Sep     | 1.004263 | 4.815746 | 10.9225  | 1.52E-18 | 6.75E-17 |
| RBM3      | -1.36023 | 7.782048 | -10.8108 | 2.63E-18 | 1.14E-16 |
| ENPP2     | 1.047151 | 4.275735 | 10.80368 | 2.73E-18 | 1.17E-16 |
| C3AR1     | 1.501524 | 9.733587 | 10.61052 | 7.07E-18 | 2.87E-16 |
| XAF1      | 1.807038 | 8.716581 | 10.60067 | 7.42E-18 | 2.98E-16 |
| CDKN1A    | 1.167235 | 8.944735 | 10.37825 | 2.22E-17 | 8.57E-16 |
| ADM       | 1.559301 | 7.588803 | 10.37805 | 2.23E-17 | 8.57E-16 |
| H2AFV     | -1.20975 | 6.829831 | -10.2648 | 3.90E-17 | 1.47E-15 |
| DEFB1     | 1.360108 | 5.98619  | 10.25416 | 4.11E-17 | 1.54E-15 |
| ZNF91     | -1.34745 | 7.619867 | -10.2166 | 4.95E-17 | 1.82E-15 |
| HSPA6     | 1.025425 | 7.365093 | 9.91126  | 2.24E-16 | 7.56E-15 |
| CXCL11    | 1.58894  | 4.038712 | 9.787248 | 4.15E-16 | 1.36E-14 |
| NFE2      | 1.276545 | 7.336118 | 9.7498   | 4.99E-16 | 1.62E-14 |

|           |          |          |          |          |          |
|-----------|----------|----------|----------|----------|----------|
| IFI6      | 1.996473 | 7.536071 | 9.636758 | 8.74E-16 | 2.77E-14 |
| ACSL1     | 1.312344 | 8.748151 | 9.599287 | 1.05E-15 | 3.29E-14 |
| P2RY13    | 1.147945 | 8.136913 | 9.508197 | 1.65E-15 | 5.01E-14 |
| GRN       | 1.04644  | 9.625999 | 9.4005   | 2.82E-15 | 8.35E-14 |
| HIST1H2Bf | 1.196992 | 6.377773 | 9.255074 | 5.79E-15 | 1.64E-13 |
| BST2      | 1.013575 | 8.399299 | 9.215145 | 7.06E-15 | 1.99E-13 |
| FFAR2     | 1.851985 | 7.917569 | 9.199241 | 7.64E-15 | 2.14E-13 |
| IDO1      | 1.680744 | 7.07697  | 9.12246  | 1.12E-14 | 3.04E-13 |
| TNFAIP6   | 2.147784 | 6.198443 | 9.057084 | 1.54E-14 | 4.15E-13 |
| GZMK      | -1.12937 | 8.772031 | -8.93259 | 2.86E-14 | 7.50E-13 |
| NFIL3     | 1.091538 | 8.706087 | 8.64432  | 1.19E-13 | 2.84E-12 |
| AQP9      | 1.19124  | 8.722    | 8.415927 | 3.65E-13 | 8.17E-12 |
| SH2D1A    | -1.05844 | 7.384044 | -8.16228 | 1.27E-12 | 2.64E-11 |
| GPR183    | -1.08453 | 7.483866 | -7.86433 | 5.42E-12 | 1.03E-10 |
| IL1RN     | 1.534816 | 9.029574 | 7.860076 | 5.53E-12 | 1.04E-10 |
| BCL11B    | -1.23617 | 7.873893 | -7.71461 | 1.12E-11 | 1.98E-10 |
| ABLIM1    | -1.09787 | 8.473102 | -7.56556 | 2.30E-11 | 3.88E-10 |
| HIST1H2A  | 1.088521 | 9.751543 | 7.437137 | 4.27E-11 | 6.81E-10 |
| MS4A1     | -1.29013 | 9.040284 | -7.39719 | 5.17E-11 | 8.16E-10 |
| CDKN1C    | 1.111179 | 8.090916 | 7.199165 | 1.33E-10 | 1.97E-09 |
| HSPB1     | 1.15912  | 7.225509 | 6.99872  | 3.45E-10 | 4.76E-09 |
| APOBEC3E  | 1.902764 | 5.941999 | 6.691017 | 1.47E-09 | 1.82E-08 |
| ITM2A     | -1.10435 | 7.728025 | -6.66191 | 1.68E-09 | 2.05E-08 |
| LEF1      | -1.06671 | 8.834887 | -6.61633 | 2.07E-09 | 2.50E-08 |
| MXD1      | 1.000549 | 6.492971 | 6.481558 | 3.87E-09 | 4.46E-08 |
| ATF3      | 1.085395 | 8.316003 | 6.239389 | 1.17E-08 | 1.27E-07 |
| FCGR3B    | 1.1655   | 10.24337 | 6.214274 | 1.32E-08 | 1.40E-07 |
| IL7R      | -1.05698 | 9.753249 | -5.90874 | 5.20E-08 | 5.00E-07 |
| RRM2      | 1.181847 | 7.429349 | 5.821728 | 7.66E-08 | 7.18E-07 |
| CXCR2     | 1.196109 | 7.41316  | 5.505827 | 3.05E-07 | 2.58E-06 |
| KCNJ15    | 1.074866 | 6.277059 | 5.02931  | 2.28E-06 | 1.63E-05 |
| CXCL8     | -1.20115 | 9.096006 | -3.85354 | 0.00021  | 0.000947 |
