# Supplementary material for: Identification of stage-related and severity-related biomarkers and exploration of immune landscape for Dengue by comprehensive analyses
Source: Springer Nature journal article supplement (doi:10.1186/s12985-022-01853-8), 2022-08-02
Supplement: MOESM8 [file 23329006]

| Gene     | logFC    | AveExpr  | t        | P.Value  | adj.P.Val |
|----------|----------|----------|----------|----------|-----------|
| IFI27    | 5.52156  | 8.644821 | 21.96298 | 3.75E-44 | 3.03E-40  |
| RRM2     | 3.525531 | 8.971619 | 20.00354 | 2.81E-40 | 1.14E-36  |
| TYMS     | 2.948119 | 8.436925 | 19.04574 | 2.62E-38 | 7.07E-35  |
| CD38     | 2.650206 | 8.771497 | 17.77728 | 1.27E-35 | 2.58E-32  |
| CACNA2D  | -1.48212 | 5.51221  | -16.8524 | 1.32E-33 | 2.13E-30  |
| GMNN     | 2.197851 | 7.386768 | 16.74491 | 2.27E-33 | 2.72E-30  |
| PCNA     | 1.925673 | 8.890688 | 16.43415 | 1.11E-32 | 1.12E-29  |
| ZWINT    | 2.467968 | 7.103607 | 16.30172 | 2.19E-32 | 1.97E-29  |
| UBE2C    | 1.514975 | 6.714159 | 16.20059 | 3.68E-32 | 2.98E-29  |
| FABP5    | 2.039464 | 7.7019   | 16.04204 | 8.34E-32 | 6.13E-29  |
| CD1C     | -1.10077 | 7.216866 | -15.9309 | 1.48E-31 | 9.70E-29  |
| TPX2     | 1.72376  | 6.219746 | 15.92119 | 1.56E-31 | 9.70E-29  |
| CDC20    | 2.082387 | 6.438311 | 15.87723 | 1.96E-31 | 1.13E-28  |
| NUSAP1   | 2.237412 | 7.180653 | 15.79448 | 3.01E-31 | 1.62E-28  |
| HIST1H1C | 1.18036  | 7.04075  | 15.66208 | 6.00E-31 | 3.03E-28  |
| CDKN3    | 2.23152  | 6.3273   | 15.58754 | 8.85E-31 | 4.21E-28  |
| PTTG1    | 1.921112 | 8.866056 | 15.57089 | 9.65E-31 | 4.34E-28  |
| BIRC5    | 1.784462 | 6.573373 | 15.41872 | 2.14E-30 | 9.11E-28  |
| GIN52    | 1.633628 | 6.762558 | 15.32243 | 3.55E-30 | 1.43E-27  |
| CKS2     | 2.068417 | 7.23411  | 15.10158 | 1.13E-29 | 4.17E-27  |
| BUB1     | 2.165623 | 5.569953 | 14.94736 | 2.56E-29 | 9.01E-27  |
| MCM6     | 1.634582 | 8.123851 | 14.91364 | 3.06E-29 | 1.03E-26  |
| FEN1     | 1.430699 | 7.625347 | 14.86586 | 3.95E-29 | 1.28E-26  |
| CCNB2    | 1.91268  | 6.84032  | 14.73312 | 7.98E-29 | 2.48E-26  |
| RTN1     | -1.5278  | 4.794751 | -14.6146 | 1.50E-28 | 4.49E-26  |
| CDC45    | 1.108236 | 5.718048 | 14.50464 | 2.70E-28 | 7.78E-26  |
| CCNA2    | 1.586122 | 5.599496 | 14.38396 | 5.14E-28 | 1.40E-25  |
| NCAPG    | 1.743382 | 5.712428 | 14.38169 | 5.20E-28 | 1.40E-25  |
| TK1      | 1.133757 | 5.979789 | 14.27695 | 9.12E-28 | 2.38E-25  |
| CKS1B    | 1.10935  | 7.536526 | 14.2022  | 1.36E-27 | 3.44E-25  |
| TOP2A    | 1.831794 | 5.525213 | 14.08834 | 2.51E-27 | 5.97E-25  |
| POLE2    | 1.127223 | 6.294895 | 13.84859 | 9.14E-27 | 2.11E-24  |
| CDK1     | 1.852121 | 5.843353 | 13.73669 | 1.67E-26 | 3.76E-24  |
| MANF     | 1.311499 | 8.971208 | 13.7114  | 1.92E-26 | 4.20E-24  |
| HMMR     | 1.484165 | 6.315986 | 13.46795 | 7.19E-26 | 1.49E-23  |
| MCM2     | 1.349752 | 7.439785 | 13.46176 | 7.44E-26 | 1.50E-23  |
| CDC6     | 1.039853 | 5.07311  | 13.35536 | 1.33E-25 | 2.62E-23  |
| TRIP13   | 1.142252 | 6.205543 | 13.29252 | 1.87E-25 | 3.52E-23  |
| SAR1B    | 1.372206 | 7.471139 | 13.24967 | 2.36E-25 | 4.34E-23  |
| RFC4     | 1.409818 | 7.164493 | 13.17996 | 3.45E-25 | 6.21E-23  |
| MKI67    | 1.119872 | 5.982507 | 13.01862 | 8.34E-25 | 1.38E-22  |
| AURKA    | 1.250872 | 5.519546 | 13.01247 | 8.63E-25 | 1.40E-22  |
| GZMB     | 1.393964 | 10.58891 | 13.00118 | 9.18E-25 | 1.46E-22  |
| NDC80    | 1.489256 | 4.982188 | 12.85498 | 2.04E-24 | 3.06E-22  |
| STMN1    | 1.260918 | 7.576568 | 12.83596 | 2.27E-24 | 3.34E-22  |
| NELL2    | -1.15448 | 8.189404 | -12.7193 | 4.31E-24 | 6.22E-22  |
| ISG20    | 1.081013 | 9.601929 | 12.70563 | 4.64E-24 | 6.58E-22  |
| AURKB    | 1.119806 | 6.092521 | 12.68282 | 5.26E-24 | 7.33E-22  |
| NME1     | 1.096349 | 8.231963 | 12.56492 | 1.01E-23 | 1.33E-21  |
| SLAMF7   | 1.292258 | 7.238835 | 12.50405 | 1.41E-23 | 1.72E-21  |
| MTHFD2   | 1.009282 | 8.555925 | 12.49436 | 1.48E-23 | 1.79E-21  |
| APOBEC3E | 1.964862 | 6.186044 | 12.30455 | 4.22E-23 | 4.95E-21  |
| XBP1     | 1.473855 | 8.648047 | 12.29365 | 4.48E-23 | 5.13E-21  |
| RACGAP1  | 1.473986 | 5.448512 | 12.29288 | 4.50E-23 | 5.13E-21  |
| MYL6B    | 1.004823 | 6.730841 | 12.24681 | 5.81E-23 | 6.43E-21  |
| SRP54    | 1.045065 | 7.894293 | 12.24104 | 5.99E-23 | 6.55E-21  |
| PBK      | 1.823904 | 5.134479 | 12.20099 | 7.48E-23 | 7.96E-21  |

|           |          |          |          |          |          |
|-----------|----------|----------|----------|----------|----------|
| SUB1      | 1.171644 | 11.17957 | 12.20083 | 7.49E-23 | 7.96E-21 |
| TUBG1     | 1.019991 | 5.457503 | 12.18972 | 7.96E-23 | 8.29E-21 |
| BUB1B     | 1.395615 | 5.991457 | 12.18888 | 8.00E-23 | 8.29E-21 |
| KIF4A     | 1.057755 | 5.482926 | 12.17669 | 8.55E-23 | 8.75E-21 |
| FKBP11    | 1.678198 | 8.992823 | 12.10107 | 1.30E-22 | 1.31E-20 |
| CASP3     | 1.101391 | 7.199253 | 12.08905 | 1.39E-22 | 1.37E-20 |
| EZH2      | 1.3796   | 5.727346 | 11.95416 | 2.93E-22 | 2.75E-20 |
| GGH       | 2.023446 | 5.60424  | 11.9381  | 3.20E-22 | 2.97E-20 |
| IL13RA1   | -1.02305 | 6.671867 | -11.9127 | 3.68E-22 | 3.31E-20 |
| PRC1      | 1.410613 | 5.400473 | 11.81559 | 6.31E-22 | 5.48E-20 |
| MAN1A1    | 1.387368 | 8.443629 | 11.77263 | 8.00E-22 | 6.74E-20 |
| IDH2      | 1.092347 | 8.539302 | 11.75972 | 8.59E-22 | 7.16E-20 |
| CENPE     | 1.043623 | 5.481305 | 11.68973 | 1.27E-21 | 1.01E-19 |
| KIF20A    | 1.025363 | 4.94023  | 11.63449 | 1.72E-21 | 1.35E-19 |
| CHEK1     | 1.261228 | 4.397335 | 11.59559 | 2.14E-21 | 1.64E-19 |
| TNFRSF17  | 2.690346 | 7.666701 | 11.30118 | 1.09E-20 | 7.50E-19 |
| CTNNA1    | 1.0025   | 5.749705 | 11.12473 | 2.92E-20 | 1.92E-18 |
| KIF15     | 1.183446 | 4.956528 | 10.9309  | 8.57E-20 | 5.46E-18 |
| TTK       | 1.338076 | 4.649877 | 10.91396 | 9.42E-20 | 5.90E-18 |
| CPVL      | -1.16572 | 8.937595 | -10.8848 | 1.11E-19 | 6.79E-18 |
| KIF11     | 1.789853 | 4.841394 | 10.78379 | 1.94E-19 | 1.15E-17 |
| PRDX4     | 1.360686 | 8.241621 | 10.75858 | 2.23E-19 | 1.30E-17 |
| SMC4      | 1.170422 | 7.811149 | 10.62125 | 4.79E-19 | 2.71E-17 |
| UAP1      | 1.617443 | 7.692249 | 10.57313 | 6.26E-19 | 3.38E-17 |
| IGJ       | 1.714038 | 9.991761 | 10.36782 | 1.96E-18 | 9.60E-17 |
| FBXO5     | 1.107709 | 4.516082 | 10.30362 | 2.80E-18 | 1.34E-16 |
| PAICS     | 1.003506 | 7.687267 | 9.995101 | 1.55E-17 | 6.53E-16 |
| LAP3      | 1.077039 | 9.576823 | 9.960083 | 1.88E-17 | 7.76E-16 |
| MX1       | 1.365149 | 10.03266 | 9.958509 | 1.90E-17 | 7.79E-16 |
| CLEC4A    | -1.13747 | 7.023307 | -9.95431 | 1.94E-17 | 7.93E-16 |
| MAD2L1    | 1.500736 | 5.224085 | 9.850049 | 3.46E-17 | 1.33E-15 |
| OAS2      | 1.00151  | 8.418226 | 9.845616 | 3.55E-17 | 1.35E-15 |
| MCM5      | 1.001125 | 7.813064 | 9.824755 | 3.98E-17 | 1.50E-15 |
| ELL2      | 1.508726 | 6.319344 | 9.786769 | 4.91E-17 | 1.84E-15 |
| USP18     | 1.185739 | 6.358102 | 9.710371 | 7.49E-17 | 2.67E-15 |
| SLC1A4    | 1.17233  | 5.899039 | 9.704561 | 7.74E-17 | 2.74E-15 |
| RRM1      | 1.132432 | 8.001128 | 9.679464 | 8.89E-17 | 3.10E-15 |
| HIST1H2Bf | 1.022769 | 6.402619 | 9.471446 | 2.80E-16 | 8.78E-15 |
| ITM2C     | 1.295696 | 8.151864 | 9.169632 | 1.47E-15 | 3.95E-14 |
| CDKN1C    | -1.41183 | 6.689408 | -8.69031 | 2.01E-14 | 4.45E-13 |
| SDF2L1    | 1.207478 | 7.330406 | 8.660466 | 2.37E-14 | 5.14E-13 |
| DUSP5     | 1.110586 | 7.64696  | 8.204015 | 2.78E-13 | 5.06E-12 |
| MS4A1     | -1.24015 | 8.930373 | -8.17972 | 3.16E-13 | 5.70E-12 |
| PPIB      | 1.113508 | 9.993215 | 8.164111 | 3.44E-13 | 6.14E-12 |
| ISG15     | 1.407873 | 9.907618 | 8.150028 | 3.71E-13 | 6.53E-12 |
| GBP1      | 1.304719 | 8.795961 | 8.067009 | 5.78E-13 | 9.90E-12 |
| IFI44     | 1.123536 | 8.961361 | 7.877251 | 1.58E-12 | 2.54E-11 |
| IFI44L    | 1.529007 | 9.090553 | 7.502773 | 1.13E-11 | 1.65E-10 |
| CCR2      | 1.028547 | 9.244754 | 7.36177  | 2.36E-11 | 3.23E-10 |
| SGK1      | -1.00816 | 9.765077 | -6.86206 | 3.05E-10 | 3.49E-09 |
| TREM1     | -1.05895 | 8.178988 | -6.72387 | 6.10E-10 | 6.56E-09 |
| PPP1R15A  | -1.01378 | 8.47655  | -6.33852 | 4.10E-09 | 3.85E-08 |
| TPD52     | 1.006421 | 7.989509 | 6.275403 | 5.57E-09 | 5.05E-08 |
| SERPING1  | 1.378765 | 6.404018 | 6.070444 | 1.49E-08 | 1.24E-07 |
| HBB       | -1.72678 | 11.49115 | -5.72609 | 7.56E-08 | 5.47E-07 |
| IFI6      | 1.005302 | 7.154847 | 5.609144 | 1.30E-07 | 9.06E-07 |
| CD83      | -1.18384 | 8.294901 | -5.52731 | 1.89E-07 | 1.28E-06 |
| IER3      | -1.29213 | 8.828202 | -5.47374 | 2.41E-07 | 1.61E-06 |

|        |          |          |          |          |          |
|--------|----------|----------|----------|----------|----------|
| PTGS2  | -1.46945 | 7.463654 | -5.45668 | 2.60E-07 | 1.73E-06 |
| LGALS2 | -1.28155 | 7.802286 | -5.41866 | 3.08E-07 | 2.03E-06 |
| IFIT1  | 1.281082 | 8.632264 | 5.349381 | 4.21E-07 | 2.69E-06 |
| CXCL8  | -1.66039 | 8.688539 | -5.0144  | 1.83E-06 | 1.04E-05 |
| IL1B   | -1.45551 | 9.167138 | -4.38266 | 2.50E-05 | 0.000114 |
| GOS2   | -1.27993 | 8.223953 | -4.14258 | 6.37E-05 | 0.000265 |
| TNF    | -1.07436 | 7.296669 | -4.03453 | 9.59E-05 | 0.000387 |
| CXCL10 | 1.007338 | 7.72204  | 3.471584 | 0.000717 | 0.002353 |
| CXCL2  | -1.06024 | 6.969738 | -3.17123 | 0.001921 | 0.005624 |
