# Supplementary material for: Identification of stage-related and severity-related biomarkers and exploration of immune landscape for Dengue by comprehensive analyses
Source: Springer Nature journal article supplement (doi:10.1186/s12985-022-01853-8), 2022-08-02
Supplement: MOESM9 [file 23329006]

| Gene    | logFC    | AveExpr  | t        | P.Value  | adj.P.Val |
|---------|----------|----------|----------|----------|-----------|
| CDKN1C  | -2.52301 | 7.117522 | -14.0209 | 4.32E-27 | 3.49E-23  |
| NME1    | 1.308282 | 8.154468 | 13.40445 | 1.19E-25 | 4.83E-22  |
| RPLP0   | 1.26228  | 11.00854 | 13.03094 | 9.08E-25 | 2.45E-21  |
| MX2     | -1.78483 | 9.502232 | -12.899  | 1.86E-24 | 3.77E-21  |
| HERC5   | -2.11202 | 8.660831 | -12.7626 | 3.92E-24 | 6.34E-21  |
| CCL8    | -3.09414 | 6.169335 | -12.6116 | 8.95E-24 | 1.03E-20  |
| HESX1   | -1.60032 | 5.674644 | -12.4619 | 2.03E-23 | 1.83E-20  |
| CTSL    | -1.45738 | 7.891716 | -12.3799 | 3.19E-23 | 2.34E-20  |
| OASL    | -1.6468  | 8.462847 | -12.3424 | 3.92E-23 | 2.64E-20  |
| JUP     | -1.11981 | 6.104034 | -12.2225 | 7.57E-23 | 4.71E-20  |
| MS4A4A  | -2.67346 | 6.573296 | -12.1836 | 9.37E-23 | 5.36E-20  |
| LDHB    | 1.011155 | 11.00549 | 12.1728  | 9.95E-23 | 5.36E-20  |
| TNFSF10 | -1.90895 | 10.46161 | -12.1035 | 1.46E-22 | 6.92E-20  |
| BIRC5   | 1.469231 | 6.70581  | 12.01187 | 2.41E-22 | 1.08E-19  |
| CDKN3   | 1.876037 | 6.477749 | 11.92407 | 3.91E-22 | 1.58E-19  |
| TPX2    | 1.353961 | 6.37325  | 11.77257 | 9.02E-22 | 2.80E-19  |
| TYMS    | 1.996401 | 8.824503 | 11.64386 | 1.83E-21 | 5.49E-19  |
| PTTG1   | 1.576912 | 9.010526 | 11.63151 | 1.96E-21 | 5.67E-19  |
| FABP5   | 1.669117 | 7.857207 | 11.5958  | 2.39E-21 | 6.06E-19  |
| IFIT1   | -2.71808 | 10.20504 | -11.5954 | 2.40E-21 | 6.06E-19  |
| GINS2   | 1.301327 | 6.900922 | 11.57278 | 2.72E-21 | 6.64E-19  |
| LILRA3  | -1.71561 | 7.532098 | -11.5541 | 3.01E-21 | 6.96E-19  |
| ZWINT   | 1.921421 | 7.330079 | 11.54432 | 3.18E-21 | 7.14E-19  |
| C3AR1   | -1.64657 | 9.49059  | -11.5386 | 3.28E-21 | 7.17E-19  |
| STMN1   | 1.2057   | 7.604534 | 11.50537 | 3.94E-21 | 8.39E-19  |
| CDC20   | 1.66083  | 6.61389  | 11.44921 | 5.38E-21 | 1.04E-18  |
| LILRB2  | -1.61848 | 8.558089 | -11.3951 | 7.25E-21 | 1.27E-18  |
| RRM2    | 2.343684 | 9.452233 | 11.37726 | 8.01E-21 | 1.35E-18  |
| SIGLEC1 | -1.52735 | 8.101672 | -11.2719 | 1.43E-20 | 2.32E-18  |
| PAICS   | 1.301826 | 7.575471 | 11.23522 | 1.76E-20 | 2.58E-18  |
| MX1     | -1.49354 | 11.15918 | -11.2047 | 2.08E-20 | 3.00E-18  |
| CDKN1A  | -1.17565 | 8.819312 | -11.1962 | 2.18E-20 | 3.09E-18  |
| ISG15   | -1.94774 | 11.22898 | -11.1858 | 2.31E-20 | 3.22E-18  |
| CCR1    | -1.29103 | 9.926298 | -11.1563 | 2.72E-20 | 3.68E-18  |
| CCNB2   | 1.55254  | 6.990991 | 11.14623 | 2.87E-20 | 3.81E-18  |
| OAS1    | -1.48414 | 8.958996 | -11.1297 | 3.15E-20 | 4.04E-18  |
| CASP5   | -1.03988 | 5.696363 | -11.1219 | 3.29E-20 | 4.15E-18  |
| OAS3    | -1.8135  | 9.581522 | -11.0794 | 4.16E-20 | 4.94E-18  |
| OAS2    | -1.12572 | 9.256425 | -11.0612 | 4.60E-20 | 5.39E-18  |
| IFIH1   | -1.66745 | 6.915425 | -11.0367 | 5.27E-20 | 5.92E-18  |
| GLUL    | -1.18828 | 9.830661 | -10.9783 | 7.28E-20 | 7.64E-18  |
| LMO2    | -1.3973  | 8.851264 | -10.9631 | 7.92E-20 | 8.12E-18  |
| HPSE    | -1.16033 | 6.987195 | -10.9569 | 8.19E-20 | 8.18E-18  |
| IFIT3   | -2.47056 | 9.744453 | -10.9268 | 9.68E-20 | 9.55E-18  |
| PLSCR1  | -1.37881 | 10.42835 | -10.921  | 9.99E-20 | 9.74E-18  |
| FEN1    | 1.152198 | 7.741619 | 10.83042 | 1.65E-19 | 1.52E-17  |
| CCL2    | -2.70575 | 7.217413 | -10.782  | 2.16E-19 | 1.90E-17  |
| SLC31A2 | -1.35815 | 8.784053 | -10.7787 | 2.20E-19 | 1.90E-17  |
| TOP2A   | 1.496078 | 5.665911 | 10.76588 | 2.36E-19 | 2.01E-17  |
| GMPR    | -1.10672 | 6.042945 | -10.7563 | 2.49E-19 | 2.07E-17  |
| TLR7    | -1.33849 | 6.595328 | -10.7091 | 3.23E-19 | 2.54E-17  |
| LAMP3   | -1.63293 | 5.908953 | -10.709  | 3.23E-19 | 2.54E-17  |
| DDX58   | -1.63011 | 7.904656 | -10.6913 | 3.56E-19 | 2.77E-17  |
| CCNA2   | 1.241109 | 5.7426   | 10.62801 | 5.06E-19 | 3.75E-17  |
| RFC4    | 1.260158 | 7.230198 | 10.61481 | 5.45E-19 | 3.94E-17  |
| SLC7A7  | -1.03029 | 9.709052 | -10.6144 | 5.46E-19 | 3.94E-17  |
| UBE2C   | 1.047053 | 6.905045 | 10.58874 | 6.29E-19 | 4.42E-17  |

|          |          |          |          |          |          |
|----------|----------|----------|----------|----------|----------|
| H1F0     | -1.09817 | 6.893067 | -10.5237 | 9.02E-19 | 6.01E-17 |
| CD27     | 1.258945 | 9.05427  | 10.51714 | 9.35E-19 | 6.10E-17 |
| IL15     | -1.09503 | 7.03999  | -10.4885 | 1.10E-18 | 6.98E-17 |
| IFITM3   | -1.26108 | 12.29495 | -10.4767 | 1.17E-18 | 7.39E-17 |
| IRF7     | -1.5741  | 9.483542 | -10.4534 | 1.33E-18 | 8.34E-17 |
| MARCKS   | -1.60563 | 9.139907 | -10.4478 | 1.37E-18 | 8.54E-17 |
| NUSAP1   | 1.600358 | 7.441414 | 10.43507 | 1.47E-18 | 8.95E-17 |
| NCAPG    | 1.391867 | 5.858869 | 10.41053 | 1.69E-18 | 1.02E-16 |
| CDK1     | 1.490502 | 5.994299 | 10.38552 | 1.94E-18 | 1.15E-16 |
| GMNN     | 1.508936 | 7.667643 | 10.37969 | 2.00E-18 | 1.18E-16 |
| IFI44    | -1.28202 | 9.909184 | -10.362  | 2.21E-18 | 1.28E-16 |
| ABCA1    | -1.29116 | 6.209325 | -10.358  | 2.26E-18 | 1.29E-16 |
| BUB1     | 1.722858 | 5.754257 | 10.34474 | 2.43E-18 | 1.38E-16 |
| IFIT5    | -1.27597 | 7.368671 | -10.3317 | 2.61E-18 | 1.48E-16 |
| MT2A     | -1.0999  | 11.21105 | -10.2467 | 4.17E-18 | 2.24E-16 |
| TLR1     | -1.30133 | 7.402487 | -10.2438 | 4.24E-18 | 2.26E-16 |
| HMMR     | 1.20922  | 6.431134 | 10.21518 | 4.97E-18 | 2.58E-16 |
| BAG2     | 1.064192 | 5.40003  | 10.21046 | 5.10E-18 | 2.63E-16 |
| SERPING1 | -2.3875  | 7.88607  | -10.1737 | 6.25E-18 | 3.12E-16 |
| CFD      | -1.33459 | 8.646049 | -10.1541 | 6.96E-18 | 3.41E-16 |
| PRDX2    | 1.322803 | 8.268121 | 10.13711 | 7.65E-18 | 3.68E-16 |
| BUB1B    | 1.210771 | 6.070871 | 10.13087 | 7.92E-18 | 3.79E-16 |
| FGL2     | -1.36032 | 10.07694 | -10.09   | 9.92E-18 | 4.66E-16 |
| SERPINA1 | -1.50694 | 10.58732 | -10.0878 | 1.00E-17 | 4.69E-16 |
| SMC4     | 1.142665 | 7.827904 | 10.08051 | 1.05E-17 | 4.86E-16 |
| IFI44L   | -1.7552  | 10.38455 | -10.0748 | 1.08E-17 | 4.99E-16 |
| MCM2     | 1.116184 | 7.538052 | 10.06134 | 1.16E-17 | 5.25E-16 |
| UBE2L6   | -1.0225  | 10.18745 | -10.0282 | 1.40E-17 | 6.13E-16 |
| DEFB1    | -1.22434 | 5.928594 | -10.0254 | 1.42E-17 | 6.20E-16 |
| KMO      | -1.12955 | 6.76865  | -10.0077 | 1.56E-17 | 6.76E-16 |
| EMR2     | -1.07307 | 5.886826 | -9.99418 | 1.68E-17 | 7.21E-16 |
| SCO2     | -1.21407 | 9.315363 | -9.95529 | 2.09E-17 | 8.79E-16 |
| USP18    | -1.37717 | 7.367871 | -9.93143 | 2.38E-17 | 9.82E-16 |
| RRM1     | 1.227741 | 7.969492 | 9.908762 | 2.70E-17 | 1.10E-15 |
| TFEC     | -1.58305 | 7.644142 | -9.90574 | 2.74E-17 | 1.12E-15 |
| MCM6     | 1.197181 | 8.303384 | 9.841683 | 3.91E-17 | 1.54E-15 |
| VRK1     | 1.135989 | 7.051338 | 9.823871 | 4.31E-17 | 1.67E-15 |
| PILRA    | -1.52534 | 6.628331 | -9.75387 | 6.34E-17 | 2.28E-15 |
| LYN      | -1.06928 | 8.442868 | -9.75106 | 6.44E-17 | 2.30E-15 |
| LILRA2   | -1.23832 | 8.099664 | -9.73875 | 6.89E-17 | 2.44E-15 |
| PCNA     | 1.176657 | 9.193734 | 9.738251 | 6.91E-17 | 2.44E-15 |
| PBK      | 1.549391 | 5.251167 | 9.728631 | 7.28E-17 | 2.54E-15 |
| NAGK     | -1.03761 | 9.794701 | -9.70866 | 8.13E-17 | 2.81E-15 |
| CCNC     | 1.014637 | 9.008343 | 9.680733 | 9.48E-17 | 3.22E-15 |
| IFITM2   | -1.04877 | 12.52591 | -9.61874 | 1.33E-16 | 4.46E-15 |
| MCM5     | 1.043514 | 7.801495 | 9.611615 | 1.39E-16 | 4.62E-15 |
| CD1D     | -1.07079 | 7.435717 | -9.60229 | 1.46E-16 | 4.76E-15 |
| C1QBP    | 1.051366 | 7.664966 | 9.58929  | 1.57E-16 | 5.01E-15 |
| HMGB1    | 1.205197 | 9.283921 | 9.577935 | 1.67E-16 | 5.27E-15 |
| GZMK     | 1.362412 | 9.030202 | 9.574451 | 1.70E-16 | 5.35E-15 |
| LGALS3BP | -1.44236 | 8.119282 | -9.54532 | 2.00E-16 | 6.23E-15 |
| PRC1     | 1.177253 | 5.498965 | 9.504794 | 2.50E-16 | 7.58E-15 |
| DYNLT1   | -1.02805 | 10.04416 | -9.43961 | 3.57E-16 | 1.05E-14 |
| CCT2     | 1.05606  | 7.943694 | 9.438279 | 3.60E-16 | 1.05E-14 |
| CKS2     | 1.304068 | 7.543879 | 9.405244 | 4.31E-16 | 1.21E-14 |
| NOD2     | -1.0131  | 6.411822 | -9.3676  | 5.30E-16 | 1.47E-14 |
| GCH1     | -1.00726 | 10.16273 | -9.36269 | 5.44E-16 | 1.51E-14 |
| LPAR6    | -1.09735 | 8.559657 | -9.34993 | 5.84E-16 | 1.59E-14 |

|           |          |          |          |          |          |
|-----------|----------|----------|----------|----------|----------|
| KIF11     | 1.617239 | 4.917999 | 9.349728 | 5.84E-16 | 1.59E-14 |
| CXCL10    | -3.04556 | 9.314491 | -9.3396  | 6.18E-16 | 1.66E-14 |
| LY6E      | -1.1484  | 9.485178 | -9.28605 | 8.28E-16 | 2.17E-14 |
| FKBP11    | 1.451111 | 9.090203 | 9.237625 | 1.08E-15 | 2.77E-14 |
| GGH       | 1.695673 | 5.74279  | 9.175828 | 1.51E-15 | 3.75E-14 |
| TYROBP    | -1.17127 | 11.21721 | -9.15563 | 1.69E-15 | 4.13E-14 |
| EZH2      | 1.112507 | 5.838893 | 9.144549 | 1.80E-15 | 4.35E-14 |
| KIF15     | 1.020517 | 5.026292 | 9.133216 | 1.91E-15 | 4.57E-14 |
| TLR2      | -1.09246 | 9.181738 | -9.1267  | 1.98E-15 | 4.71E-14 |
| FCN1      | -1.24752 | 11.12488 | -9.12395 | 2.01E-15 | 4.75E-14 |
| FCER1G    | -1.11522 | 10.68591 | -9.09198 | 2.39E-15 | 5.56E-14 |
| P2RY13    | -1.44395 | 7.838526 | -9.08721 | 2.46E-15 | 5.64E-14 |
| CHEK1     | 1.046983 | 4.487588 | 9.082052 | 2.53E-15 | 5.77E-14 |
| ASNS      | 1.046664 | 6.537342 | 9.054678 | 2.93E-15 | 6.59E-14 |
| ITGB3BP   | 1.060638 | 7.064659 | 9.031115 | 3.34E-15 | 7.41E-14 |
| SLC11A1   | -1.00772 | 7.776163 | -9.0085  | 3.77E-15 | 8.24E-14 |
| IL1RN     | -1.87304 | 8.665627 | -9.00498 | 3.85E-15 | 8.34E-14 |
| CD14      | -1.1334  | 10.68261 | -8.93102 | 5.75E-15 | 1.21E-13 |
| CEBPB     | -1.10093 | 10.79588 | -8.87754 | 7.69E-15 | 1.58E-13 |
| TNFRSF17  | 2.426982 | 7.783378 | 8.86524  | 8.23E-15 | 1.68E-13 |
| GZMA      | 1.012663 | 10.35691 | 8.86249  | 8.35E-15 | 1.69E-13 |
| RACGAP1   | 1.092971 | 5.605154 | 8.786103 | 1.26E-14 | 2.45E-13 |
| MNDA      | -1.07125 | 10.86024 | -8.75839 | 1.47E-14 | 2.79E-13 |
| FPR1      | -1.13368 | 10.22488 | -8.7226  | 1.78E-14 | 3.30E-13 |
| SH2D1A    | 1.147508 | 7.547321 | 8.716353 | 1.84E-14 | 3.41E-13 |
| MAD2L1    | 1.412745 | 5.266094 | 8.69041  | 2.12E-14 | 3.87E-13 |
| TTK       | 1.110098 | 4.745895 | 8.621628 | 3.08E-14 | 5.45E-13 |
| NDC80     | 1.049353 | 5.161971 | 8.62072  | 3.09E-14 | 5.46E-13 |
| AIM2      | -1.11333 | 8.090113 | -8.61541 | 3.19E-14 | 5.55E-13 |
| TPD52     | 1.488545 | 7.805737 | 8.496365 | 6.05E-14 | 1.01E-12 |
| MAN1A1    | 1.074948 | 8.572969 | 8.493202 | 6.16E-14 | 1.02E-12 |
| HCK       | -1.06518 | 9.337898 | -8.48466 | 6.45E-14 | 1.06E-12 |
| FFAR2     | -1.80117 | 7.757599 | -8.4457  | 7.95E-14 | 1.28E-12 |
| ITM2C     | 1.295349 | 8.158515 | 8.412762 | 9.49E-14 | 1.49E-12 |
| MS4A6A    | -1.0682  | 9.728285 | -8.37244 | 1.18E-13 | 1.83E-12 |
| MAFB      | -1.23699 | 9.951336 | -8.36595 | 1.22E-13 | 1.88E-12 |
| UAP1      | 1.505741 | 7.74413  | 8.312678 | 1.62E-13 | 2.46E-12 |
| XBP1      | 1.156948 | 8.779579 | 8.228221 | 2.55E-13 | 3.77E-12 |
| ADM       | -1.29468 | 7.589066 | -8.22817 | 2.55E-13 | 3.77E-12 |
| FCGR2A    | -1.05673 | 7.782691 | -8.18329 | 3.24E-13 | 4.68E-12 |
| CST3      | -1.18744 | 9.509897 | -8.16812 | 3.52E-13 | 5.03E-12 |
| SDF2L1    | 1.200359 | 7.339265 | 8.069755 | 5.94E-13 | 8.01E-12 |
| AQP9      | -1.40749 | 8.467666 | -8.06411 | 6.12E-13 | 8.22E-12 |
| C5AR1     | -1.14687 | 8.702863 | -8.03823 | 7.02E-13 | 9.29E-12 |
| GRN       | -1.05857 | 9.510762 | -7.99127 | 9.01E-13 | 1.17E-11 |
| DUSP6     | -1.08295 | 9.525288 | -7.98864 | 9.14E-13 | 1.18E-11 |
| FPR2      | -1.21008 | 6.940957 | -7.94829 | 1.13E-12 | 1.42E-11 |
| PPIB      | 1.159518 | 9.980792 | 7.817819 | 2.25E-12 | 2.66E-11 |
| NFIL3     | -1.13323 | 8.568218 | -7.80068 | 2.47E-12 | 2.90E-11 |
| RBM3      | 1.12246  | 7.777606 | 7.676609 | 4.74E-12 | 5.27E-11 |
| HSPA13    | 1.122917 | 6.444764 | 7.659735 | 5.17E-12 | 5.71E-11 |
| CD8A      | 1.018953 | 9.278135 | 7.643814 | 5.62E-12 | 6.14E-11 |
| HIST2H2BF | -1.19009 | 7.994953 | -7.63808 | 5.79E-12 | 6.30E-11 |
| IGJ       | 1.370818 | 10.13481 | 7.588613 | 7.50E-12 | 7.97E-11 |
| NFE2      | -1.14875 | 7.282287 | -7.42249 | 1.78E-11 | 1.78E-10 |
| BCL2A1    | -1.33421 | 9.534002 | -7.34175 | 2.70E-11 | 2.63E-10 |
| KLF4      | -1.02042 | 8.916127 | -7.28815 | 3.57E-11 | 3.38E-10 |
| MYOF      | -1.23465 | 7.958585 | -7.26789 | 3.96E-11 | 3.72E-10 |

|          |          |          |          |          |          |
|----------|----------|----------|----------|----------|----------|
| RNASE2   | -1.01233 | 9.898965 | -7.12856 | 8.09E-11 | 7.15E-10 |
| MAP3K7CI | -1.45621 | 7.404855 | -7.1014  | 9.29E-11 | 8.12E-10 |
| ACSL1    | -1.22671 | 8.664983 | -6.87305 | 2.96E-10 | 2.38E-09 |
| CD38     | 1.085505 | 9.397662 | 6.830154 | 3.67E-10 | 2.89E-09 |
| ELL2     | 1.159401 | 6.463749 | 6.79539  | 4.37E-10 | 3.41E-09 |
| XAF1     | -1.10039 | 8.960207 | -6.71803 | 6.43E-10 | 4.85E-09 |
| GBP1     | -1.07566 | 9.734835 | -6.67365 | 8.03E-10 | 5.96E-09 |
| ATF3     | -1.30137 | 8.072747 | -6.59948 | 1.16E-09 | 8.38E-09 |
| HSPB1    | -1.2385  | 7.05775  | -6.42443 | 2.75E-09 | 1.85E-08 |
| CXCL11   | -1.1645  | 4.133141 | -6.2098  | 7.80E-09 | 4.94E-08 |
| CLU      | -1.03889 | 7.862656 | -6.08215 | 1.44E-08 | 8.87E-08 |
| SPI1     | -1.07675 | 6.892757 | -6.00892 | 2.04E-08 | 1.23E-07 |
| FCGR3B   | -1.2471  | 10.0736  | -5.96325 | 2.53E-08 | 1.50E-07 |
| NAMPT    | -1.07217 | 8.039961 | -5.92326 | 3.05E-08 | 1.79E-07 |
| TNFAIP6  | -1.56729 | 6.330206 | -5.88337 | 3.69E-08 | 2.15E-07 |
| HCAR3    | -1.31367 | 8.300846 | -5.87539 | 3.83E-08 | 2.22E-07 |
| CXCR2    | -1.228   | 7.270478 | -5.56584 | 1.60E-07 | 8.45E-07 |
| HBB      | -1.57827 | 11.42431 | -5.01836 | 1.82E-06 | 8.42E-06 |
| IDO1     | -1.14461 | 7.229886 | -4.89475 | 3.08E-06 | 1.39E-05 |
| PF4      | -1.0234  | 10.09788 | -4.77599 | 5.08E-06 | 2.21E-05 |
| PPBP     | -1.00002 | 10.08721 | -4.40564 | 2.30E-05 | 9.00E-05 |
| MAFF     | -1.07547 | 6.67012  | -4.36346 | 2.72E-05 | 0.000105 |
