# Supplementary material for: Identification of stage-related and severity-related biomarkers and exploration of immune landscape for Dengue by comprehensive analyses
Source: Springer Nature journal article supplement (doi:10.1186/s12985-022-01853-8), 2022-08-02
Supplement: MOESM10 [file 23329006]

| Gene      | logFC    | AveExpr  | t        | P.Value  | adj.P.Val |
|-----------|----------|----------|----------|----------|-----------|
| PSPH      | -1.05274 | 5.350858 | -4.28553 | 0.000209 | 0.678119  |
| CACNA2D   | -1.314   | 6.493936 | -4.19824 | 0.000264 | 0.678119  |
| LOC28608  | -1.79684 | 4.594629 | -4.10968 | 0.000333 | 0.678119  |
| POMZP3    | -1.12563 | 6.575035 | -3.99139 | 0.000456 | 0.678119  |
| PLA2G7    | -1.09606 | 6.933809 | -3.94701 | 0.000512 | 0.678119  |
| IFNB1     | 1.280757 | 4.985103 | 3.907076 | 0.000569 | 0.678119  |
| HLA-DQB1  | -1.70985 | 7.250014 | -3.81223 | 0.00073  | 0.678119  |
| FRG1B     | 1.636674 | 6.353221 | 3.743664 | 0.000873 | 0.678119  |
| CPA3      | -1.02361 | 6.811063 | -3.42251 | 0.002001 | 0.678119  |
| MYOM2     | -2.11089 | 8.487519 | -3.41684 | 0.00203  | 0.678119  |
| ZNF595    | 1.195492 | 5.346245 | 3.315802 | 0.002625 | 0.678119  |
| DNAAF2    | -1.15157 | 7.518239 | -3.23192 | 0.003242 | 0.678119  |
| SCOC      | -1.06214 | 8.413396 | -3.16245 | 0.003858 | 0.678119  |
| MEFV      | 1.1288   | 7.472897 | 3.158333 | 0.003897 | 0.678119  |
| LOC10027  | 1.019662 | 4.258133 | 3.070053 | 0.004851 | 0.678119  |
| HEPACAM   | 1.223259 | 4.351208 | 2.971608 | 0.006177 | 0.678119  |
| TMED2     | -1.22813 | 8.98699  | -2.90421 | 0.007276 | 0.678119  |
| ZNF600    | -1.06721 | 8.232449 | -2.84505 | 0.008392 | 0.678119  |
| AC092192  | 1.072606 | 4.670935 | 2.737589 | 0.010842 | 0.678119  |
| CTD-2076  | 1.045998 | 4.12209  | 2.590673 | 0.015289 | 0.678119  |
| CEACAM6   | 1.046368 | 6.474206 | 2.484438 | 0.019505 | 0.678119  |
| RP1-142L7 | 1.152275 | 4.440718 | 2.460907 | 0.020574 | 0.678119  |
| LOC10050  | 1.051809 | 4.003469 | 2.448371 | 0.021165 | 0.678119  |
| ZNF528    | 1.162024 | 5.566906 | 2.43086  | 0.022017 | 0.678119  |
| LOC10192  | 1.039873 | 5.195303 | 2.311623 | 0.028705 | 0.681467  |
| APOBEC3E  | -1.74979 | 8.936359 | -2.28829 | 0.030213 | 0.681467  |
| ALDH1A1   | -1.06225 | 8.782954 | -2.20854 | 0.035924 | 0.681467  |
| DEFA4     | 1.128427 | 7.839452 | 2.201699 | 0.036456 | 0.681467  |
| TCN1      | 1.00889  | 8.040293 | 2.08227  | 0.046969 | 0.688815  |
| TPTE2P6   | 1.05676  | 4.036277 | 2.055161 | 0.049702 | 0.688815  |
