# Supplementary material for: Identification of stage-related and severity-related biomarkers and exploration of immune landscape for Dengue by comprehensive analyses
Source: Springer Nature journal article supplement (doi:10.1186/s12985-022-01853-8), 2022-08-02
Supplement: MOESM11 [file 23329006]

| Gene     | logFC    | AveExpr  | t        | P.Value  | adj.P.Val |
|----------|----------|----------|----------|----------|-----------|
| ZNF595   | 1.193134 | 5.36667  | 5.022812 | 6.32E-06 | 0.002443  |
| RTN1     | -1.3367  | 6.45682  | -4.97101 | 7.57E-06 | 0.00245   |
| HP       | 1.578049 | 8.084475 | 4.862371 | 1.11E-05 | 0.002567  |
| MIR3916  | -1.01701 | 6.340038 | -4.83356 | 1.22E-05 | 0.002673  |
| MS4A4A   | 1.241787 | 8.024534 | 4.642263 | 2.36E-05 | 0.003705  |
| S100P    | 1.457164 | 9.413366 | 4.574467 | 2.98E-05 | 0.004159  |
| OPHN1    | 1.564741 | 10.67469 | 4.451056 | 4.52E-05 | 0.005154  |
| FRG1B    | 1.399552 | 6.116104 | 4.390788 | 5.54E-05 | 0.005794  |
| LOC28608 | -1.05459 | 3.825435 | -4.37992 | 5.74E-05 | 0.005923  |
| CLIC3    | -1.02728 | 8.079148 | -4.21555 | 9.92E-05 | 0.00754   |
| ADM      | 1.228782 | 9.292053 | 4.104148 | 0.000143 | 0.008876  |
| BTK      | 1.140897 | 8.71469  | 4.067115 | 0.000161 | 0.009491  |
| LOC10192 | 1.063818 | 5.234987 | 3.951607 | 0.000234 | 0.011449  |
| IFIT1    | 1.310688 | 11.16301 | 3.693612 | 0.00053  | 0.017157  |
| SLPI     | 1.031344 | 6.913368 | 3.652394 | 0.000603 | 0.018355  |
| MMP8     | 1.747531 | 6.876295 | 3.606651 | 0.000694 | 0.0198    |
| IFI27    | 1.447463 | 12.73768 | 3.598701 | 0.000711 | 0.020131  |
| CAMP     | 1.353278 | 9.537819 | 3.5624   | 0.000795 | 0.021303  |
| ERP29    | 1.094691 | 11.43245 | 3.498645 | 0.000965 | 0.023539  |
| MCEMP1   | 1.019063 | 9.679475 | 3.405358 | 0.001278 | 0.026602  |
| HERC5    | 1.000955 | 9.887843 | 3.282204 | 0.001841 | 0.032626  |
| FOLR3    | 1.229563 | 7.244607 | 3.264818 | 0.001937 | 0.03356   |
| IER3     | 1.384838 | 10.20483 | 3.261772 | 0.001955 | 0.033615  |
| IL6      | 1.324535 | 7.487933 | 3.261639 | 0.001955 | 0.033615  |
| TNF      | 1.514766 | 8.620199 | 3.219011 | 0.002214 | 0.036266  |
| RETN     | 1.103893 | 8.056399 | 3.199903 | 0.00234  | 0.037274  |
| LCN2     | 1.359391 | 8.669229 | 3.099847 | 0.003118 | 0.044048  |
| S100A12  | 1.491821 | 11.69217 | 3.084341 | 0.003259 | 0.045005  |
| RNASE3   | 1.073434 | 7.91796  | 3.072548 | 0.00337  | 0.046006  |
| IFI44L   | 1.139602 | 11.0324  | 3.072059 | 0.003374 | 0.046041  |
| ELANE    | 1.232331 | 6.238481 | 3.043503 | 0.003658 | 0.048569  |
| USP9Y    | -1.57888 | 5.023027 | -3.0116  | 0.004    | 0.051254  |
| OLFM4    | 1.433727 | 6.08808  | 2.915986 | 0.005216 | 0.05924   |
| BCL2A1   | 1.218555 | 11.0354  | 2.902498 | 0.005412 | 0.060471  |
| RNASE2   | 1.055133 | 11.39996 | 2.872292 | 0.005878 | 0.063235  |
| CCL8     | 1.308832 | 6.358116 | 2.815611 | 0.006855 | 0.06949   |
| TXLNGY   | -1.51002 | 5.390662 | -2.81022 | 0.006955 | 0.069917  |
| ANXA3    | 1.122934 | 7.500534 | 2.746055 | 0.008257 | 0.077974  |
| TNFAIP6  | 1.228966 | 8.102012 | 2.741071 | 0.008367 | 0.078582  |
| KDM5D    | -1.73947 | 5.936435 | -2.69024 | 0.009568 | 0.085545  |
| TCN1     | 1.051903 | 7.595229 | 2.645378 | 0.010758 | 0.091574  |
| RSAD2    | 1.041707 | 9.469706 | 2.635466 | 0.011038 | 0.093029  |
| CMPK2    | 1.032492 | 10.58084 | 2.620907 | 0.011462 | 0.094951  |
| SERPINB2 | 1.178727 | 7.332759 | 2.591172 | 0.012375 | 0.099614  |
| GOS2     | 1.068148 | 9.782677 | 2.564503 | 0.013249 | 0.10425   |
| XIST     | 1.606529 | 7.072945 | 2.563435 | 0.013285 | 0.104307  |
| EIF1AY   | -2.11029 | 5.906054 | -2.56265 | 0.013312 | 0.104441  |
| CCL2     | 1.283445 | 6.96092  | 2.561802 | 0.013341 | 0.104515  |
| CEACAM8  | 1.381081 | 7.472643 | 2.521548 | 0.014776 | 0.111329  |
| CXCL3    | 1.346672 | 7.121005 | 2.519334 | 0.014859 | 0.111642  |
| CXCL8    | 1.314063 | 10.97158 | 2.515313 | 0.01501  | 0.112504  |
| DDX3Y    | -1.14022 | 5.055542 | -2.50074 | 0.015572 | 0.114806  |
| LTF      | 1.258821 | 9.415118 | 2.462011 | 0.017156 | 0.121644  |
| IFI6     | 1.131356 | 11.97862 | 2.418494 | 0.019109 | 0.129352  |
| ANKRD22  | 1.081901 | 8.433552 | 2.386745 | 0.020658 | 0.135309  |
| IL1B     | 1.292196 | 10.41642 | 2.375311 | 0.021243 | 0.13713   |
| DEFA4    | 1.099808 | 8.147578 | 2.304297 | 0.025219 | 0.151956  |

RPS4Y1 -2.20362 8.337062 -2.21703 0.031002 0.172046
